# Supplementary material for: Incorporation of catechyl monomers into lignins: lignification from the non-phenolic endviaDiels–Alder cycloaddition?
Source: Royal Society of Chemistry journal article supplement (doi:10.1039/d1gc03022a), 2021-01-01
Supplement: d1gc03022a2.pdf [file d1gc03022a2.pdf]

**Electronic Supplementary Information (ESI) Figures** – see separate pdf.

**Figure S1.** Diels-Alder reactions and products from 4-*O*-methyl coniferyl alcohol **6** and the benzoquinone **9** from methyl 5-hydroxyvanillate **11**.

**Figure S2.** Proton NMR spectrum of Diels-Alder product **13**.

**Figure S3.** Proton NMR spectrum of Diels-Alder product **15**.

**Figure S4.** Carbon NMR spectra of Diels-Alder products **13** and **15**.

**Figure S5.** Proton NMR spectra of benzodioxane products **12** and **12'**.

**Figure S6.** Carbon NMR spectra of benzodioxane products **12** and **12'**.

**Figure S7.**  $^1\text{H}$ - $^{13}\text{C}$  correlation spectra of the benzodioxane **12**.

**Figure S8.**  $^1\text{H}$ - $^{13}\text{C}$  correlation spectra of the benzodioxane **12'**.
